## RESEARCH ARTICLE

# Chemical volatiles present in cotton gin trash: A by-product of cotton processing

Mary A. Egbuta<sup>1</sup>, Shane McIntosh<sup>1,2</sup>, Daniel L. E. Waters<sup>1,3</sup>, Tony Vancov<sup>1,2</sup>, Lei Liu<sup>1\*</sup>

**1** Southern Cross Plant Science, Southern Cross University, Lismore, New South Wales, Australia, **2** New South Wales Department of Primary Industries, Wollongbar, New South Wales, Australia, **3** ARC ITTC for Functional Grains, Charles Sturt University, Wagga, Wagga, New South Wales, Australia

\* [ben.liu@scu.edu.au](mailto:ben.liu@scu.edu.au)

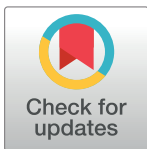

## Abstract

Cotton gin trash (CGT), a waste product of cotton gins, make up about 10% of each bale of cotton bolls ginned. The current study investigates high value volatile compounds in CGT to add value to this by-product. The volatile compounds in CGT and different parts of the cotton plant were extracted using various methods, identified by gas chromatography-mass spectrometry (GC-MS) or nuclear magnetic resonance (NMR) spectroscopy, and then quantified by gas chromatography-flame ionisation detection (GC-FID) against available standards. Terpenoids including monoterpenoids and sesquiterpenoids were found to be the most abundant, making up 64.66% (area under peak) of total volatiles extracted by hydro-distillation. The major extractable terpenoids in CGT were  $\alpha$ -pinene (13.69–23.05  $\mu\text{g/g}$ ),  $\beta$ -caryophyllene (3.99–74.32  $\mu\text{g/g}$ ),  $\alpha$ -humulene (2.00–25.71  $\mu\text{g/g}$ ), caryophyllene oxide (41.50–102.08  $\mu\text{g/g}$ ) and  $\beta$ -bisabolol (40.05–137.32  $\mu\text{g/g}$ ). Recoveries varied between different extraction methods. The terpenoids were found to be more abundant in the calyx (659.12  $\mu\text{g/g}$ ) and leaves (627.72  $\mu\text{g/g}$ ) than in stalks (112.97  $\mu\text{g/g}$ ) and stems (24.24  $\mu\text{g/g}$ ) of the cotton plant, indicating the possible biological origin of CGT volatiles. This study is the first to identify and quantify the different terpenoids present in CGT and significantly,  $\beta$ -bisabolol, an abundant compound (sesquiterpene alcohol) which may have valuable biological prospects. These findings therefore contribute to identifying alternative management strategies and uses of CGT.

## OPEN ACCESS

**Citation:** Egbuta MA, McIntosh S, Waters DLE, Vancov T, Liu L (2019) Chemical volatiles present in cotton gin trash: A by-product of cotton processing. PLoS ONE 14(9): e0222146. <https://doi.org/10.1371/journal.pone.0222146>

**Editor:** Walid Elfalleh, Higher Institute of Applied Sciences and Technology of Gabes University of Gabes, TUNISIA

**Received:** May 13, 2019

**Accepted:** August 22, 2019

**Published:** September 18, 2019

**Copyright:** © 2019 Egbuta et al. This is an open access article distributed under the terms of the [Creative Commons Attribution License](https://creativecommons.org/licenses/by/4.0/), which permits unrestricted use, distribution, and reproduction in any medium, provided the original author and source are credited.

**Data Availability Statement:** All relevant data are within the paper and its supporting information files.

**Funding:** The funder, Cotton Research Development Corporation (CRDC), Australia, had a role to play in the decision to publish this manuscript. Approval was sought and received prior to submission of the manuscript. L.L., S.M. and T.V. received the research grant from CRDC, Agreement Number DAN1504 (<https://www.crdc.gov.au/>).

## Introduction

Cotton gin trash (CGT) is the waste product generated from cotton ginning, a process whereby mature cotton bolls are separated into different components such as seeds and fibres, which are used as raw materials for production of end products such as cotton seed oil and fabric [1]. Comprising mainly leaves, sticks, calyx (burrs), lint and soil, CGT makes up about 10% of each bale of cotton ginned, and therefore, results in several million tons of CGT generated yearly [1,2]. Normal disposal of cotton gin trash has been by incineration, landfilling and composting, and in some cases, it is used as feed supplements for livestock [3,4]. Recently, CGT has also been exploited as an alternative source of sugars [5] for conversion into bioethanol [6–9]

com.au/). M.E. PhD scholarship was paid as part of this award.

**Competing interests:** The funder of this project is Cotton Research Development Corporation (CRDC), Australia. CRDC website is <https://www.crdc.com.au/>. L.L., S.M. and T.V. received the research grant from CRDC (Agreement Number DAN1504). M.E. PhD scholarship was paid as part of this award. This does not alter our adherence to PLOS ONE policies on sharing data and materials. CRDC has given their approval to us to publish the full results of this project.

since it contains considerable amount of fibre and has been piled up closed to the ginning factories. Although the exploitation of CGT for ethanol is possible, this is not considered a commercially viable pathway for utilisation of the trash. Therefore, it is necessary to investigate other possible uses of CGT in order to add value to this by-product.

Volatile chemicals are typical secondary metabolites of many plants including cotton [10,11]. These volatile compounds, mainly terpenoids, are stored in plants and released when needed, or can be synthesised at the time of need [12,13]. Monoterpenoids and sesquiterpenoids are the most common terpenoids in cotton and are distributed in different parts of the plant including leaves, boll, calyx, stem, stalks and roots [14–16]. Terpenoids found in cotton include pinene, myrcene, caryophyllene, humulene, caryophyllene oxide and bisabolol etc. [17–20]. Some of these terpenoids are known to be of potentially high value due to their biological activities which may have applications in agricultural and pharmaceutical industries [21–23]. The presence of these high value terpenoids distributed throughout the cotton plant therefore triggers some motive to exploit CGT as a potential source of these volatile chemicals. This assumption has been partially confirmed by Agblevor et al. (2003), who reported the proximate composition of CGT and different groups of compounds such as total carbohydrates and extractives, although the individual extractives were not characterised [23].

Generally, determination of the composition of plant volatiles can be achieved by extracting the compounds from various parts of the plant. Extraction procedures are dependent on the nature (matrix properties) of the plant and its parts, and differ by temperature, extraction solvent, time and pressure [24,25]. Methods such as hydro-distillation, headspace, soxhlet, maceration, microwave assisted extraction, ultrasound assisted extraction, enzyme assisted extraction and supercritical fluid extraction are examples of effective techniques for extracting bioactive compounds from plant materials [24,26–29]. These techniques have been implemented in extraction of volatile compounds depending on the nature of the target compounds in different plants, including isolation from cotton tissues. Evaluation of extractives from the cotton plant by hydro-distillation [20], particularly from aerial parts of the plants, identified terpenoids such as pinene, limonene, caryophyllene and humulene. The organic solvents, hexane and pentane were used by Opitz et al. (2008) to determine the concentration in cotton leaves of some terpenoids including  $\alpha$  and  $\beta$ -pinene, myrcene, ocimene, caryophyllene, humulene and  $\beta$ -bisabolol [19]. Recovery of these terpenoids demonstrated the effectiveness of these methods to determine phytochemicals of the cotton plant. With regards to CGT, research concerning recovery of extractives is seldom reported, though, evaluation of total extractives by Agblevor et al. (2003) was done by Soxhlet extraction using 95% ethanol but no particular compound was identified or quantified [23].

Although phytochemical study of cotton suggests the plant is a reservoir of extractives, particularly terpenoids, information on the complete volatile composition of CGT is still unclear. In this study, different extraction and analytical methods were implemented to achieve recovery, identification and quantification of terpenoids present in the trash. Methods implemented for extraction of compounds from CGT are well established for extracting a wide range of chemicals from plant materials [24,30]. These methods are also suitable for use at an industrial scale. Postharvest trash (PHT) or the cotton plant material left standing in the field after harvesting also represents a significant biomass feedstock, hence, PHT was comparatively investigated for volatile extractives. The different components of CGT and PHT were also analysed for terpenoids composition in order to determine the most valuable component. Ultimately this information may underpin a more lucrative product diversification for the cotton industry.

## Materials and methods

### Reagents and analytical standards

Analytical standards were procured from Sigma Aldrich, Australia and included (+)- $\alpha$ -pinene (#80605), (-)- $\beta$ -pinene (#80609),  $\alpha$ -humulene (#12448),  $\beta$ -humulene (#53676), (-)- $\alpha$ -bisabolol (#95426), (-)-caryophyllene oxide (#91034) and (-)-*trans*-caryophyllene (#75541). Organic solvents n-hexane, methanol, ethanol, dichloromethane, diethyl ether and diethyl acetate were of HPLC grade and bought from Scharlau Australia.

### Sample preparation

CGT was kindly supplied by Namoi Cotton Co-operative (Yarraman Gin, NSW). All material was air-dried at 40 °C for 48 h. To achieve better uniformity and further size reduction, samples were subject to a 60 sec pulse in a pulveriser (Labtechnics Pulveriser, WA, Australia). Samples were stored at room temperature prior to extraction. Dried post-harvest trash (PHT) samples were first separated into the different components of stalks, stems, leaves and calyx (burr) prior to grinding using a Mixer mill 301 (Retsch GmbH, Germany).

### Hydro-distillation and gas chromatography-mass spectrometry (GC-MS)

**Preliminary distillation.** Preliminary hydro-distillation were performed to determine an optimised duration for the extraction procedure. CGT sample (300 g) was distilled in 2,700 mL milli-Q water sequentially for 6 h, 12 h and 18 h and extracted oil collected for the three time durations. Recovered oil was extracted with hexane and the extract analysed for terpenoids by gas chromatography-mass spectroscopy. The methods finally used for extraction, identification and semi-quantification of the volatiles from the trash samples are explained in the following sections.

**Hydro-distillation of CGT.** For all hydro-distillation, 300 g of CGT sample was submerged in 2700 mL milli-Q water and boiled for six hours after mixing in a 5,000 mL round bottom flask connected to a chiller and essential oil collected in a graduated collection tube. Following distillation, the volume of oil was measured using a graduated collection tube. The collection tube was washed with acetone and combined with collected oil was dried in a fume hood overnight. The recovered extracted oil was mixed with 3 mL milli-Q water and 5 mL hexane, shaken vigorously and centrifuged at 3,000 rpm for 3 mins. The hexane fraction was collected in a 25 mL volumetric flask and the extraction procedure repeated twice with equal volumes of hexane. Total extract in the volumetric flasks were made up to 25 mL and transferred to clean, pre-weighed 40 mL vials. Extracts were stored at 4 °C until further analysis.

Identification and semi-quantification was performed on an Agilent 6890A GC instrument equipped with a ZB-5 capillary column (Phenomenex) of dimensions 300 mm length,  $\times$  0.53 mm internal diameter (I.D)  $\times$  1.50  $\mu$ m film thickness. Samples were injected in the split mode (split ratio of 1:25) under the following conditions: injection port set at 280 °C, oven temperature held at 50 °C for 1 min, then programmed at a rate of 8 °C/min to 300 °C, helium carrier gas at a flow rate of 1.2 mL/min. An Agilent 5973 network mass selective detector was used as the detector and operated in scan mode, with a scanning mass range of 35 to 300 atomic mass unit (amu) at 5.19 scans/sec. Electron ionisation (EI) for the mass selective detector was 70eV and a solvent delay time of 6 mins was maintained when no spectra was collected. Volatile compounds in CGT extracts were identified by comparing mass spectrum with GC-MS library Wiley 275.L database and their relative abundance were compared using the peak area in the total ion chromatogram (TIC).

## Isolation and identification of unknown sesquiterpenoid

CGT oil obtained by hydro-distillation was fractionated using high-performance liquid chromatography (prep-HPLC, Agilent Technologies 1260) equipped with an ultraviolet (UV) detector and fraction collector. The CGT oil (400  $\mu$ l) was mixed with methanol (600 $\mu$ l) before injection. Separation of fractions was performed using a Luna C<sub>18</sub> column (150 mm x 21.20 mm, 55  $\mu$ m, Phenomenex Co., USA) at a flow rate of 20 mL/min of mobile phase with methanol + 0.05% trifluoroacetic acid (TFA) and water +0.05% TFA. A linear gradient elution mode was maintained with mobile phase set at 0 min for 60% methanol, 2 min for 60% methanol, 8 min for 100% methanol, 22 min for 100% methanol, 25 min for 60% methanol and 30 min for 60% methanol. The UV detection was at 210, 280 and 360 nm. A total of four injections of 250  $\mu$ l each were done with fractions collected between 4 and 18 min at an interval of 0.24 min.

The purity of each fraction was checked using the GC-MS method described above and liquid chromatography-mass spectrometry (LC-MS, Agilent Technologies 1260), equipped with a vacuum degasser, binary pump and auto injector, diode array detector (DAD, 1260) and quadrupole mass detector (MSD, 6120). An Agilent eclipse plus C18 RRHD column with specifications of 1.8  $\mu$ m, 2.1 x 50 mm was used. The mobile phase was composed of water and 0.005% TFA and acetonitrile and 0.005% TFA and the flow rate was at 0.3 mL/min. Samples were analysed using a linear elution gradient with acetonitrile, 10% at 0 min, 99% at 10 min, 99% at 11.5 min, 10% at 13 min and 10% at 15 min. Fractions collected from prep-HPLC were directly injected for LC-MS analysis and injection volume was 0.1 $\mu$ l. The mass selective detection (MSD) was carried out in electrospray ionisation (ESI) mode using the following parameters: drying gas flow, 12.0 L/min; nebulizer pressure, 35 psig; drying gas temperature, 350 °C; capillary voltage, 3000 V (positive) and a scan mass range of 100 *m/z* to 1200 *m/z*.

Fractions containing unknown sesquiterpenoids were dried under a stream of nitrogen gas, dissolved in methanol and further purified using the same prep-HPLC described above fitted with a semi-preparative HPLC column (Luna C<sub>18</sub> column, 250 x 10mm, i.d 55 $\mu$ m, Phenomenex Co., USA). The flow rate was at 4 mL/min with a linear gradient of methanol 0 mins-85%, 2 mins-85%, 20 mins-93%, 20.5 mins-100%, 21.1 mins-100%, 22 mins-85% and 30 mins-85% methanol. The fractions were collected between 10.70 and 15.00 mins at time slice of 0.10 min and their purity was checked using the GC-MS and LC-MS method described above. The confirmed pure fractions were dried under a stream of nitrogen gas and subjected to nuclear magnetic resonance (NMR) spectroscopy analysis.

The chemical structure and identity of the isolated compound was confirmed by <sup>1</sup>H-NMR and <sup>13</sup>C-NMR and 2D (heteronuclear multiple bond correlations (HMBC), homonuclear correlation spectroscopy (COSY) and rotating-frame overhauser spectroscopy (ROESY)) NMR using a Bruker 800MHz NMR with the isolated compound dissolved in deuterated chloroform (CDCl<sub>3</sub>). Optical rotation measurement was conducted on a JASCO P-1020 Polarimeter to confirm the stereochemistry of the compound isolated.

## Comparison of organic solvent extractions

The organic solvents hexane, methanol (MeOH), dichloromethane (DCM), diethyl ether (DEE), ethanol and ethyl acetate (EA) were used to extract volatile compounds from 1 g of CGT samples. Parallel extraction of compounds using each organic solvent was done in triplicate. One gram of CGT was weighed into 22 mL vials and 3 mL of each respective extraction solvent added. The mixture was sonicated for 15 min in a sonication bath (Soniclean) and centrifuged using a benchtop centrifuge (Sigma 2–5 10134 centrifuge) at 3,000 rpm for 3 mins. The supernatant (extraction solvent) containing extracts from the CGT sample was transferred

into a clean 10 mL volumetric flask. The extraction procedure using 3 mL of solvent was repeated twice and the supernatant collected in a volumetric flask and the volume made up to 10 mL with addition of the respective solvent. Each type of solvent extract was transferred into clean, pre-weighed 22 mL vials and stored at 4 °C until further analysis. One mL aliquots were collected from all extracts into clear 2 mL screw-cap HPLC vials and kept at 4 °C with bulk extracts for further analysis.

PHT components were weighed (1 g) into clean 22 mL vials and 10 mL of extraction solvent, methanol and hexane added to the samples. Extraction was done in duplicate. Samples were sonicated for 30 mins and left overnight to allow maceration of samples. The following day, samples were vigorously shaken by hand and centrifuged at 3,000 rpm for 3 mins. The supernatant (extraction solvent) was collected into clean, pre-weighed 22 mL vials and 1 mL aliquots collected for further analysis. All extracts were stored at 4 °C until further analysis.

Volatiles were extracted from a larger CGT sample using methanol and hexane. In each 500 mL conical flask, 40 g of CGT was mixed with 200 mL extraction solvent and sonicated for 1 h. After sonication, the respective CGT and extraction solvent mixtures were filtered through a Whatmann Grade 4 filter paper. At this stage, 1 mL aliquots were collected from the respective extraction solvents for further analysis.

### Quantification by gas chromatography-flame ionisation detection (GC-FID)

A Hewlett Packard 6890 series GC instrument equipped with a BPX-5 capillary column (SGE Analytical Science) (50 mm x 0.22 mm x 1 µm film thickness) fitted with a flame ionisation detector was used. Samples were injected in split mode (split ratio of 1:25) under the following conditions: injection port set at 280 °C, oven temperature held at 50 °C for 1 min, then programmed at a rate of 8 °C/min to 300 °C, helium carrier gas at a flow rate of 1.2 mL/min. Samples were analysed alongside analytical standards of known concentration ( $\beta$ -caryophyllene 4.5 mg/g,  $\alpha$ -bisabolol 3.6 mg/g, caryophyllene oxide 1.0 mg/g,  $\alpha$ -pinene 4.4 mg/g,  $\beta$ -pinene 4.5 mg/g and  $\alpha$ -humulene 2.1 mg/g) and concentration of volatiles calculated using equations derived from standard calibration curve plotted for dilutions of analytical standards.

### Data analysis

Data generated from each experiment was analysed using MSD chemstation data analysis software for GC-MS and LC-MS. Microsoft Excel, 2013 was used to calculate concentration, mean values and standard deviation and percentage composition of identified chemical volatiles. GenStat 64-bit Release 18.1 (18<sup>th</sup> edition), was used to calculate analysis of variance (ANOVA) and determine significant difference ( $P \leq 0.05$ ) using the Duncan's multiple range test. NMR spectroscopy data were analysed using Bruker's TopSpin™ software.

## Results

### GC-MS analysis of volatiles from CGT extract by hydro-distillation

Gas chromatography-mass spectrometry analysis of extracts obtained from hydro-distilled CGT oil showed different volatile chemicals. Preliminary experiments to determine the appropriate duration (6 h, 12 h or 18 h) for maximal extraction of volatile compounds from CGT by hydro-distillation indicated that most of the terpenoids in CGT were extracted after 6 h of distillation (S1 Table). After the first 6 h of hydro-distillation, 91.2% of the total extractible oil was obtained from CGT. Extending the hydro-distillation duration only slightly increased the yields by 7.0% and 1.8% at 12 h and 18 h, respectively. Likewise, most of the terpenoids were



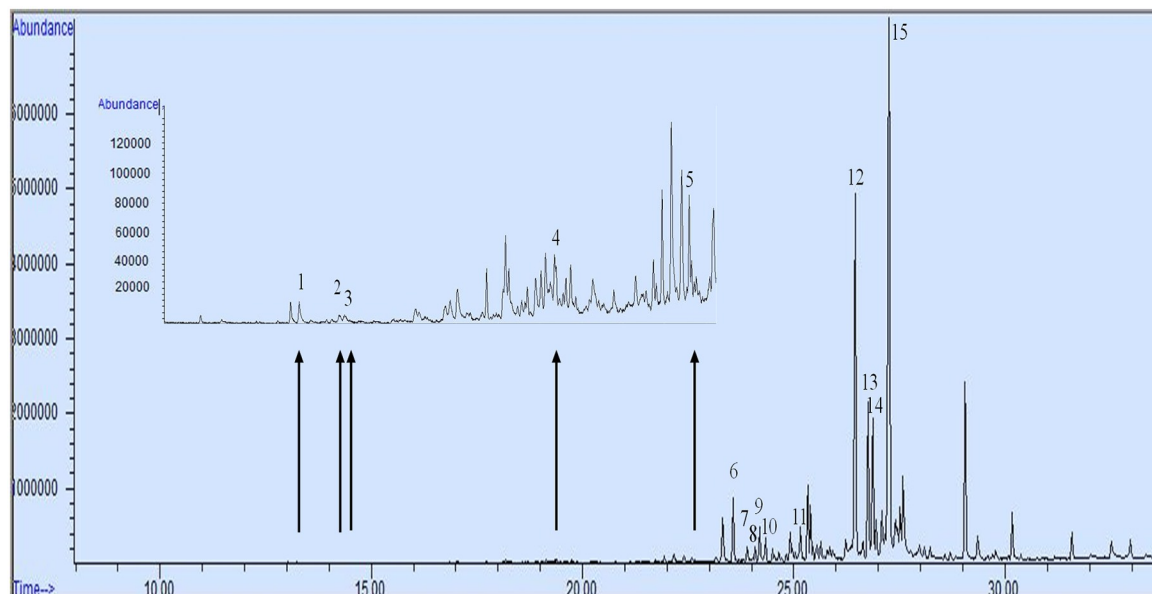

**Fig 1. Total ion chromatogram of CGT extract from hydro-distillation indicating the different terpenoids identified and semi-quantified.** Peak labelled with numbers on top are terpenoids (% area of total area under peaks): (1)  $\alpha$ -pinene (0.04), (2) myrcene (0.02), (3)  $\beta$ -pinene (0.01), (4) safranal (0.03), (5)  $\alpha$ -copaene (0.1), (6)  $\beta$ -caryophyllene (2.4), (7)  $\beta$ -santalene (0.5), (8)  $\alpha$ -curcumene (0.4), (9)  $\alpha$ -humulene (1.2), (10)  $\beta$ -farnesene (0.7), (11) nerolidol (1.2), (12) caryophyllene oxide (15.5), (13) gossonorol (5.7), (14) humulene epoxide II (5.3) and (15)  $\beta$ -bisabolol (28.9).

<https://doi.org/10.1371/journal.pone.0222146.g001>

present in the CGT extract oil obtained from the 6 h hydro-distillation, particularly the mono-terpenoids ( $\alpha$ -pinene, myrcene and  $\alpha$ -copaene) and sesquiterpenoids ( $\beta$ -caryophyllene,  $\alpha$ -humulene and  $\alpha$ -bisabolol). Hydro-distillation for 6 h recovered between 89% and 97% of the larger sesquiterpenoid compounds, therefore, the duration was subsequently used in all ensuing hydro-distillation extractions.

Detection of the major terpenoids (Fig 1) showed retention times of between 13.23 to 22.61 min for mono-terpenoids whereas, the larger sesquiterpenoids followed after with retention times between 23.57 and 27.25 min. Using the sum of all peak areas identified in the extract, the percentage composition of terpenoids was determined (Fig 1). The most abundant compound in CGT oil from hydro-distillation was tentatively identified as  $\beta$ -bisabolol (28.9%) based on GC-MS library with up to 98% quality match. Other major peaks in the chromatogram which are not labelled represent hydrocarbons and fatty acids (e.g. hexadecanoic acid, pentadecanone and farnesyl acetone) also extracted from CGT hydro-distilled oil (S2 Table).

Terpenoids identified in this study from the oil extracts of hydro-distilled CGT samples comprised of 64.7% (area under peaks) total terpenoids, consisting of about 0.1% and 64.5% mono-terpenoids and sesquiterpenoids, respectively. The other non-terpenoid volatiles constituted 35.3% of total volatiles identified in the CGT samples.

### Confirmation of $\beta$ -bisabolol by NMR spectroscopy

In order to confirm the identity of the most abundant volatile in the extract of CGT which was tentatively identified as  $\beta$ -bisabolol by GC-MS analysis, isolation by prep-HPLC and semi-prep HPLC (S1 Fig) followed by NMR spectroscopy was performed. The isolation and analysis were performed as analytical standard of  $\beta$ -bisabolol was not commercially available.

Data obtained from LC-MS analysis of the isolated compound represented in Fig 2 show total ion chromatogram, mass and ultraviolet (UV) spectrum of the compound 6-epi- $\beta$ -

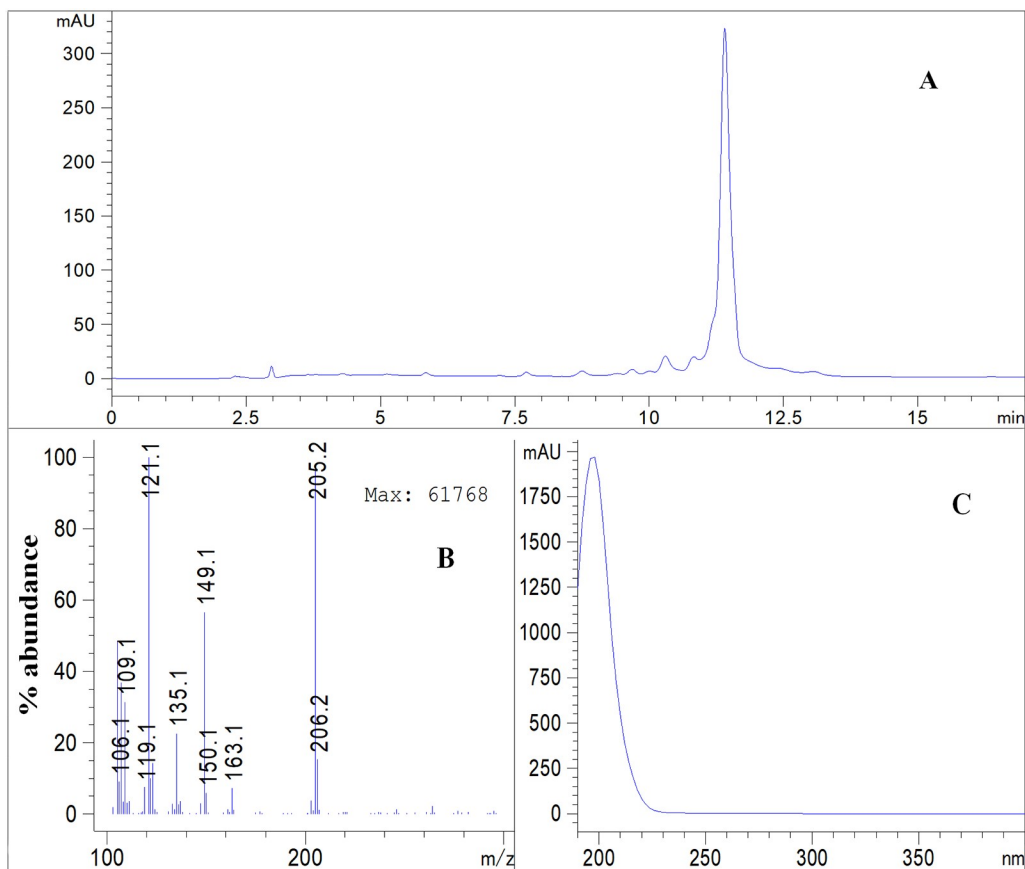

**Fig 2. Liquid chromatography total ion chromatogram (A), mass spectrum (B) and UV spectrum (C) of isolated  $\beta$ -bisabolol.**

<https://doi.org/10.1371/journal.pone.0222146.g002>

bisabolol (6R, 7S) identified by NMR spectroscopy and optical rotation data  $D = -68.2^\circ$  at  $28.7^\circ\text{C}$  ( $c = 0.0733\text{mg/mL}$  in  $\text{CHCl}_3$ ). The chemical structure was elucidated from NMR spectroscopy (Fig 3) with key HMBC, COSY and ROESY correlations. Peak assignments for  $[^1\text{H}]$  and  $[^{13}\text{C}]$  NMR spectroscopy of the identified  $\beta$ -bisabolol are presented in Table 1.

### Quantification of terpenoids in CGT by hydro-distillation and different organic solvent extractions

The total ion chromatogram (TIC) in S2 Fig shows terpenoids detected in extracts of hydro-distilled CGT oil against terpenoid standards. Cotton gin trash samples contained  $4.0\ \mu\text{g/g}$   $\beta$ -caryophyllene,  $41.5\ \mu\text{g/g}$  caryophyllene oxide,  $2.0\ \mu\text{g/g}$   $\alpha$ -humulene,  $3.0\ \mu\text{g/g}$   $\alpha$ -bisabolol and  $116.0\ \mu\text{g/g}$   $\beta$ -bisabolol (Fig 4) which was the most abundant terpenoid quantified.

Terpenoid yield by hydro-distillation was compared to yields from use of different organic solvents, to ascertain that the target compounds have been effectively recovered. Extraction of terpenoids from 1 g of CGT samples by use of ethanol (EtOH), methanol (MeOH), diethyl ether (DE), ethyl acetate (EtOAc), hexane (Hex) and dichloromethane (DCM) resulted in the recovery of similar terpenoids extracted by hydro-distillation with the exception of  $\alpha$ -bisabolol (Fig 4), which was only identified in hydro-distilled (HD) extracts. Terpenoids quantified in the different organic solvent extracts of CGT samples also show  $\beta$ -bisabolol as the most abundant terpenoid by concentration. The mean concentration of  $\beta$ -bisabolol was calculated to be

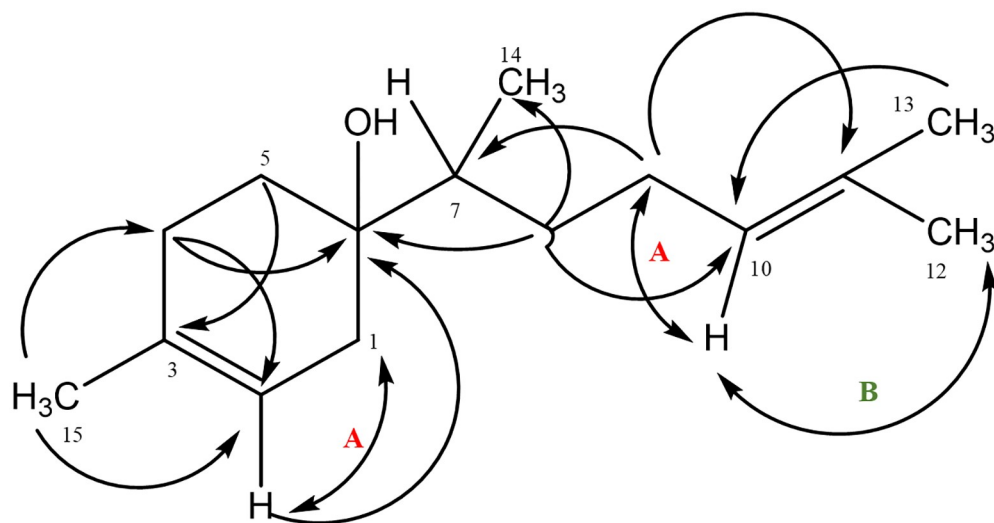

**Fig 3. Chemical structure of isolated  $\beta$ -bisabolol showing key HMBC, COSY (A) and ROESY (B) correlations.**

<https://doi.org/10.1371/journal.pone.0222146.g003>

118.4  $\mu\text{g/g}$ , 120.2  $\mu\text{g/g}$ , 120.2  $\mu\text{g/g}$ , 40.1  $\mu\text{g/g}$ , 137.3  $\mu\text{g/g}$  and 126.5  $\mu\text{g/g}$  in hexane, methanol, ethanol, dichloromethane, ethyl acetate and diethyl ether extracts, respectively.

The percentage composition of terpenoids in individual organic solvent extracts (S3 Table) was calculated based on the total concentration ( $\mu\text{g/g}$ ) of major terpenoids quantified in the different extracts. The result presented in the table explains further the proportion of the individual terpenoids against each other in the solvent extracts. Comparing terpenoids recovery from the different organic solvents, it was observed that there was more significant difference ( $P < 0.001$ ) between solvent extracts for  $\beta$ -bisabolol and caryophyllene oxide than the other terpenoids ( $P = 0.003, 0.003$  and  $0.010$ ) (S3 Table).

Total major terpenoids identified were calculated for CGT hydro-distilled and organic solvents extracts and a significant difference ( $P < 0.001$ ) was observed across the different

**Table 1.  $^1\text{H}$  and  $^{13}\text{C}$  NMR spectroscopy peak assignments of the terpenoid  $\beta$ -bisabolol isolated from CGT hydro-distilled oil.**

| C  | Carbon shift ( $\delta_{\text{C}}$ ) | Proton shift ( $\delta_{\text{H}}$ ) |
|----|--------------------------------------|--------------------------------------|
| 1  | 34.4                                 | (1.86, 2.17)                         |
| 2  | 118.6                                | 5.30 (s)                             |
| 3  | 134.2                                |                                      |
| 4  | 27.2                                 | (1.94, 2.17) m                       |
| 5  | 31.2                                 | (1.59, 1.62) m                       |
| 6  | 72.4                                 | 1.62 (s)                             |
| 7  | 42.2                                 | 1.45 (m)                             |
| 8  | 31.1                                 | (1.05, 1.69) m                       |
| 9  | 26.8                                 | (1.91, 2.10) m                       |
| 10 | 125.0                                | 5.12 (t)                             |
| 11 | 131.6                                |                                      |
| 12 | 25.9                                 | 1.69 (s)                             |
| 13 | 17.7                                 | 1.61 (s)                             |
| 14 | 13.8                                 | 0.92 (d)                             |
| 15 | 23.5                                 | 1.67 (s)                             |

<https://doi.org/10.1371/journal.pone.0222146.t001>



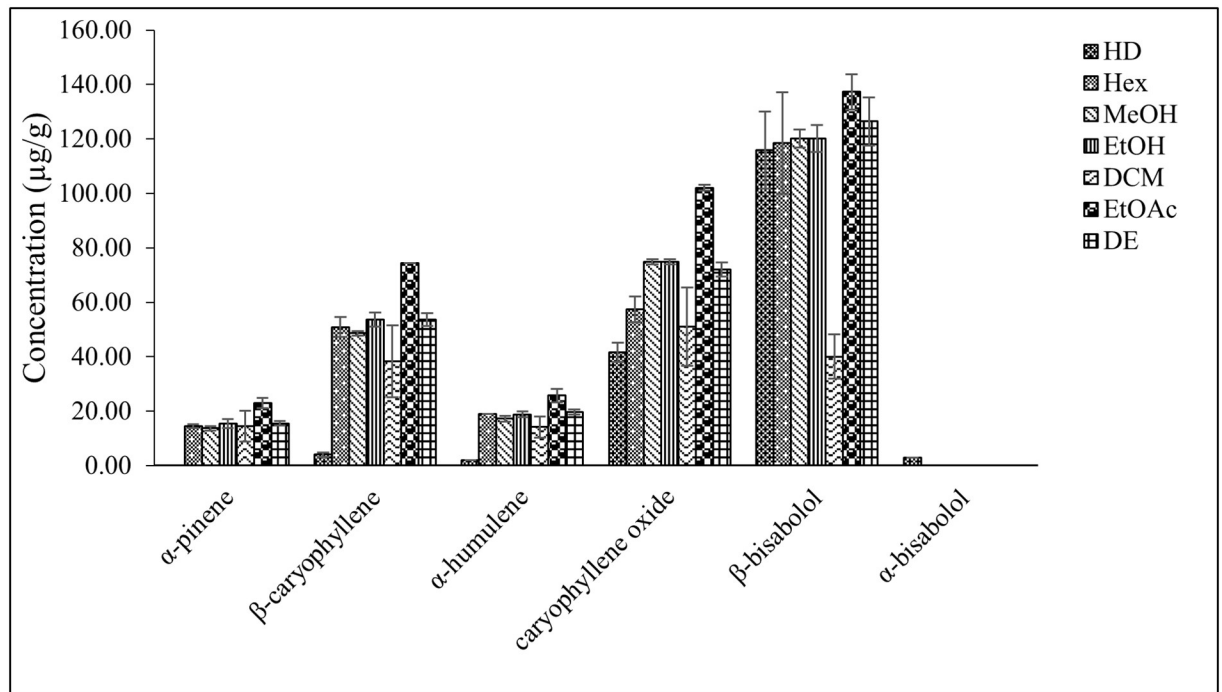

**Fig 4. Mean concentration of major terpenoids identified in CGT extracts obtained from hydro-distillation (300 g) and solvent extraction (1 g) of CGT sample replicates (n = 3).** Hydro-distillation (HD), hexane (Hex), methanol (MeOH), ethanol (EtOH), dichloromethane (DCM), ethyl acetate (EtOAc) and diethyl ether (DE). Error bars represent standard deviation of terpenoids concentration in replicate samples.

<https://doi.org/10.1371/journal.pone.0222146.g004>

extracts. [S3 Fig](#) shows the total major terpenoids identified in the extracts with Duncan's multiple range test values indicating similarities between recovery of terpenoids from hydro-distillation (HD) (166.5 µg/g) and dichloromethane (DCM) (158.0 µg/g), as well as similarities between total terpenoids in hexane (Hex) (260.0 µg/g), methanol (MeOH) (274.6 µg/g), ethanol (EtOH) (282.8 µg/g) and diethyl ether (DE) (287.3 µg/g). It is also clear that there was a significant difference between total terpenoids ([S3 Fig](#)) extracted using ethyl acetate (362.5 µg/g) and the other extracts.

Data generated from solvent extraction of volatile compounds from a larger CGT sample size (40 g) show that recovery of volatile terpenoids was higher in hexane extracts compared to methanol extracts ([Fig 5](#)). Again, in this extraction procedure, β-bisabolol was the most quantifiable terpenoid in both methanol (106.2 µg/g) and hexane (154.8 µg/g) extracts. With this method of extraction, it was observed that β-pinene and α-bisabolol were detected and quantified in both hexane and methanol extracts from 40 g CGT. These compounds were below the limit of quantification in smaller (1 g) CGT samples extracted with methanol and hexane.

### Quantification of terpenoids in cotton post-harvest trash

Volatiles quantified in hexane extracts from 1 g of different components of the post-harvest trash (PHT) ([Table 2](#)), show variation in the concentration of the targeted terpenoids. The leaves and calyx contained more terpenoids compared to the stalks and stems component of the PHT. The highest concentration of β-bisabolol (581 µg/g) was found in the calyx, followed by the leaves (564.8 µg/g), stalk (72.7 µg/g) and stem (18.3 µg/g). On the other hand, the stalk component contained highest concentrations of α-pinene (7.0 µg/g), whereas, the stem component had the lowest composition of all the terpenoids quantified (no α- and β-pinene were

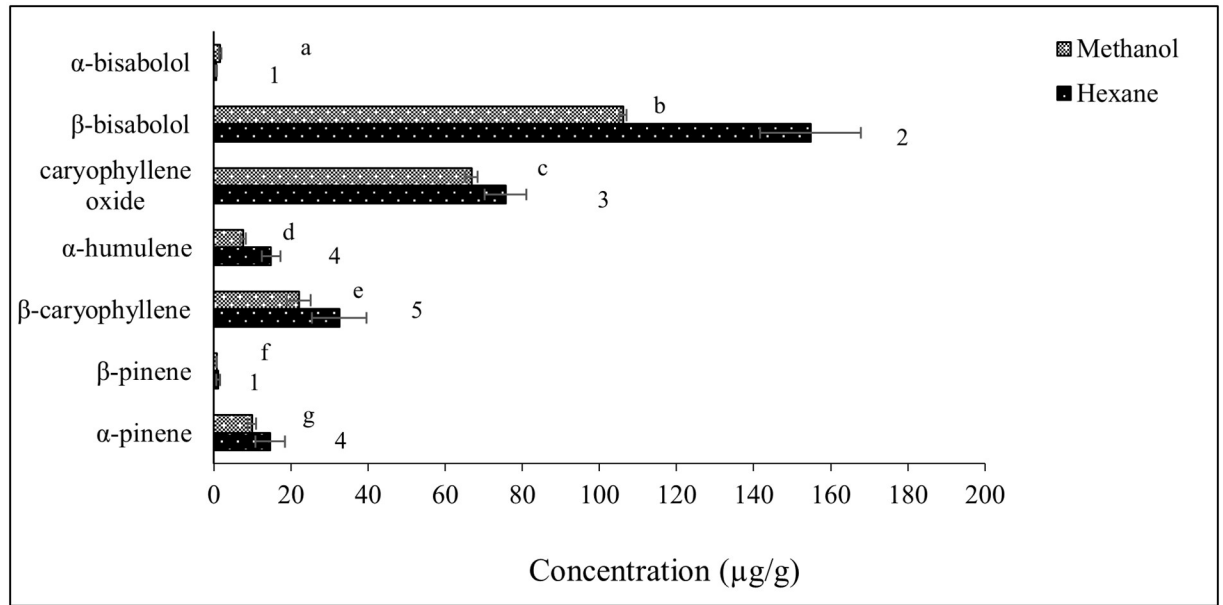

**Fig 5. Concentration of terpenoids (μg/g of CGT) detected in methanol and hexane extracts from 40 g CGT samples (n = 3) extracted with 200 mL solvent.** Error bars represent standard deviation of terpenoids concentration in replicate samples. Different superscript letters and numerals indicate significant differences (P < 0.05) between terpenes quantified in methanol and hexane extracts of CGT respectively.

<https://doi.org/10.1371/journal.pone.0222146.g005>

detected). Total concentration of target terpenoids quantified in the different components of PHT (Table 2) gives an idea of terpenoid distribution between the different plant parts. It is clear that calyx and leaves contained the most terpenoids as total terpenoid concentrations were 659.1 μg/g and 627.7 μg/g respectively. Stalks and stems contained lower concentration of total terpenoids at 113.0 μg/g and 24.2 μg/g respectively. There was an observed significant difference (P < 0.05) in total terpenoid concentration between the four different components of PHT.

### Discussion

Crop residues can serve as an alternative and cheaper source of biologically active natural products. In this study, the volatile chemical composition of waste materials from cotton

**Table 2. Mean concentration (μg/g of sample) of terpenoids in different components of post-harvest trash (n = 3) extracted with hexane and determined by GC-FID.**

| Terpenoids          | Concentration (μg/g) in PHT components |                                 |                                 |                               |
|---------------------|----------------------------------------|---------------------------------|---------------------------------|-------------------------------|
|                     | Calyx                                  | Leaves                          | Stalks                          | Stems                         |
| α-pinene            | 2.9 ± 0.1 <sup>b</sup>                 | 1.2 ± 0.3 <sup>ab</sup>         | 7.0 ± 1.4 <sup>c</sup>          | 0.0                           |
| β-pinene            | 1.6 ± 0.1 <sup>c</sup>                 | 0.3 ± 0.0 <sup>a</sup>          | 0.9 ± 0.1 <sup>b</sup>          | 0.0                           |
| β-caryophyllene     | 16.9 ± 2.8 <sup>b</sup>                | 23.7 ± 2.3 <sup>c</sup>         | 16.0 ± 2.3 <sup>b</sup>         | 3.3 ± 0.1 <sup>a</sup>        |
| α-humulene          | 5.0 ± 2.1 <sup>b</sup>                 | 8.9 ± 1.1 <sup>c</sup>          | 5.7 ± 0.5 <sup>b</sup>          | 1.2 ± 0.0 <sup>a</sup>        |
| caryophyllene oxide | 50.8 ± 8.8 <sup>c</sup>                | 28.8 ± 2.8 <sup>b</sup>         | 10.8 ± 1.4 <sup>a</sup>         | 1.4 ± 0.3 <sup>a</sup>        |
| β-bisabolol         | 582.0 ± 73.6 <sup>b</sup>              | 564.8 ± 57.5 <sup>b</sup>       | 72.7 ± 10.5 <sup>a</sup>        | 18.3 ± 1.6 <sup>a</sup>       |
| <b>Total</b>        | <b>659.2 ± 87.5<sup>a</sup></b>        | <b>627.7 ± 64.0<sup>a</sup></b> | <b>113.1 ± 16.2<sup>b</sup></b> | <b>24.2 ± 2.0<sup>c</sup></b> |

Values presented as mean concentration ± standard deviation (S.D). Different superscript letters indicate significant differences (P < 0.05) of terpenes between the different components of post-harvest trash.

<https://doi.org/10.1371/journal.pone.0222146.t002>

ginning was investigated following the hypothesis that bioactive chemicals distributed in parts of the cotton plant could be carried over into cotton gin trash (CGT) during the ginning process. Extraction of bioactive chemicals from plants or plant-based materials is achieved by means of different methods including distillation, use of solvent, maceration, Soxhlet extraction, headspace etc. [24]. Amongst these methods of extraction, hydro-distillation is one of the most common and established essential oil extraction method which recovers several different groups of compounds from plant materials [24,26,31]. This method has proven to be effective for extraction of terpenoids from a variety of plant matrices such as *Eucalyptus citriodora*, citrus, *Matricaria recutita* and their by-products [32–34]. Likewise, results in this study show a variety of terpenoids including monoterpenoids and sesquiterpenoids extracted from CGT by hydro-distillation.

The hydro-distillation process involves temperature and time, which are two important factors [30,35] in essential oil extraction. Elution of monoterpenoids from plant matrix during distillation precedes that of sesquiterpenoids as a result of their smaller molecular mass of 136.24 g/mol and lower boiling points [36]. This was observed in extracts from preliminary distillation of CGT as 100% monoterpenoids were extracted after 6 h of distillation, and, extraction of sesquiterpenoids continued up to 18 h. The duration of 6 h was sufficient for extracting most of the volatile compounds from CGT samples. Composition of terpenoids observed in extracts of hydro-distilled CGT samples corresponds with reported chemical composition of cotton plant parts such as the leaves and whole bolls [14,15,16,37,38]. The observed abundance of sesquiterpenoids compared with monoterpenoids in CGT distilled extracts also correlates with composition of terpenoids in cotton plants [39], with mostly sesquiterpenoids such as  $\beta$ -caryophyllene, caryophyllene oxide,  $\alpha$ -humulene,  $\beta$ -farnesene and  $\beta$ -bisabolol reported in the cotton plant. Monoterpenoids such as  $\alpha$ - and  $\beta$ -pinene, myrcene and limonene are also present in cotton plants, but their abundance is lower compared to sesquiterpenoids.

Notwithstanding, the different concentration of individual terpenoids identified in CGT extracts from hydro-distillation and solvent extraction, the recovery abundance for all the extracts with the exception of dichloromethane (DCM) was  $\beta$ -bisabolol > caryophyllene oxide >  $\beta$ -caryophyllene >  $\alpha$ -humulene >  $\alpha$ -pinene or  $\alpha$ -bisabolol. In this study, CGT samples were from mature cotton plants and therefore, the composition of volatile terpenoids identified not only gives a clear indication of the chemical profile of the waste material but also provides added knowledge of chemical composition of the cotton plant at full maturity. Terpenoids such as  $\beta$ -caryophyllene, caryophyllene oxide, humulene and  $\beta$ -bisabolol which are constitutive and inducible terpenoids in cotton plant parts including leaves and bracts, are known to play defensive roles against insect attack on the plant. Hence, their continuous synthesis in cotton plant tissues catalysed by the activity of terpene synthases during the period of plant growth, results in carryover of the volatiles into the waste material. The results further reveal that at full maturity, cotton plant terpenoids are mostly comprised of sesquiterpenoids, with the most abundant found to be  $\beta$ -bisabolol,  $\beta$ -caryophyllene and caryophyllene oxide.

The relatively high amount of  $\beta$ -bisabolol (confirmed by NMR spectroscopy) observed in CGT samples is in agreement with Thompson, Baker, *et al.*, (1971), Hedin *et al.*, (1972) and Elzen, Williams and Vinson (1984) findings which reported the abundance of  $\beta$ -bisabolol in cotton leaves, buds, flowers, as well as being detected in the atmosphere surrounding the cotton plant in the field [15,16,40]. Based on the yields observed for terpenoids in CGT by the two extraction methods, solvent extraction seemed to be the most effective for recovering most of the terpenoids quantified. However, hydro-distillation was effective for enriching  $\beta$ -bisabolol from CGT despite that the total concentration of terpenoids quantified was less than that obtained with organic solvent extraction. This therefore indicates that hydro-distillation could be a better approach in extracting the sesquiterpenoid  $\beta$ -bisabolol. Moreover, considering cost

effectiveness and processing of large quantities at a time, hydro-distillation could be the most viable method of recovering the terpenoids from CGT. This assumption is supported by the knowledge that distillation is the preferred and commonly employed method of extracting essential oils from plants on a commercial scale, for example in the tea tree industry [41,42].

Specific terpenoids are concentrated in different parts of the cotton plant at different proportions. Therefore, the concentration of terpenoids identified in the different components of PHT in this study, can be linked to the original distribution of the volatiles in the cotton plant. Terpenoids found in parts of the cotton plant are either stored in that part of the plant or synthesised at the time of need indicating the special functions of these terpenoids in their locations in the plant [43]. In cotton plant, terpenoids are reported to be synthesised and stored in epidermal glands (trichomes) present on different parts of the cotton plant [44–48]. The density of trichomes on the aerial part of the plant is related to terpenoid synthesis in that part of the plant [49–52], including cotton [19]. Trichome density and terpenoid production in leaves of cotton plant are mostly reported, with less emphasis on the other parts of the plant. In their study, Opitz, Kunert and Gershenzon (2008) reported the increased production of terpenoids as trichome density increased during herbivore attack on cotton leaves [19]. Therefore, the concentration of terpenoids observed in the different components of PHT could be attributed to trichome density in the different parts of the plant. This assumption can be supported with the knowledge that terpenoid production in plants including cotton is elevated in response to attack or damage by external factors such as temperature and insect impact [53,54].

Herbivoral activity, which is one of the external factors, is known to target mostly the aerial parts of the cotton plant including leaves, fruits, bolls and flowers, and less frequently other parts such as the stalks and stems [55]. Also, the optimal defence theory (ODT) which proposes that defence compounds are allocated to tissues of a plant which are likely to be targets of herbivoral attack [56], contributes to the assumption that more herbivoral activity on the leaves and calyx of the cotton plant is a possible reason for terpenoid enrichment in these tissues. The distribution of terpenoids observed in PHT components in this study is consistent with the study of Chen *et al.* (2014), which found more sesquiterpenoids in leaves of patchouli than in stems and roots [54]. Also comparing the results of this study to the study of Kasperbauer and Loughrin (2004) which reported the concentration of terpenoids in cotton leaves, concentration of particularly caryophyllene and  $\alpha$ -humulene followed a similar pattern as was observed in leaves of PHT [48]. The results of terpenoids distribution in the different components of the PHT also suggests that the leaves or calyx may be the major sources of terpenoids in CGT.

$\beta$ -Bisabolol, identified as the most abundant terpenoid in CGT, is a sesquiterpenoid alcohol and an isomer of  $\alpha$ -bisabolol, a major sesquiterpenoid found in chamomile flowers [57,58] and candeia stems [59]. Although, not as common as its stereoisomer,  $\beta$ -bisabolol has been reported to be one of the major sesquiterpenoids extracted from cotton plants [16,19], and most notably from the cotton bolls [60]. The compound has also been identified in the essential oil of *Santalum album* [61], and in trace amounts in ayu oil from *Aydedron barbeyana Mez* [62].  $\beta$ -Bisabolol acts as an insect attractant, particularly for boll weevils, and stimulates the production of sex pheromones in the insects, thereby promoting mating between opposite sexes. With limited information on biological properties of  $\beta$ -bisabolol, assumptions may be drawn from the established knowledge of bio-activity of its isomer  $\alpha$ -bisabolol [63,64]. It could be deduced that  $\beta$ -bisabolol may have similar biological properties as  $\alpha$ -bisabolol which include anti-inflammatory, anti-cancer and antibiotic [65,66]. Considering that our results presented have indicated  $\beta$ -bisabolol being the most abundant volatile in CGT, the waste material could be exploited as a source of this terpenoid.

## Conclusion

In this study, we demonstrate that bio-extractives like terpenoids are present in CGT. Most notably is the high concentration of the sesquiterpenoid alcohol  $\beta$ -bisabolol in extracts from hydro-distillation and organic solvent extraction. Hydro and steam distillations have been commonly used to extract volatiles from plant materials on an industrial scale and they should be suitable to produce essential oil rich in  $\beta$ -bisabolol from CGT. Although not investigated in this study, pH of the extracting solvents maybe exploited to further optimise the recovery of volatile compounds from CGT. The distribution of terpenoids in different components of PHT suggests that these volatile compounds are from specific plant parts and carried over to CGT occurs from harvesting cotton fibres. The presence of the volatiles in CGT and PHT suggests these by-products from cotton industry could be exploited as a source of potentially valuable bioactive compounds.

## Supporting information

**S1 Fig. Chromatogram of CGT oil.** Isolated fraction containing suspected  $\beta$ -bisabolol (black arrow) at UV of 280nm (A) and 210 nm (B) performed by preparative HPLC.

(TIF)

**S2 Fig. Total ion chromatogram of hydro-distilled CGT oil against terpenoid standards.**

(TIF)

**S3 Fig. Total major terpenoids quantified in CGT extracts from hydro-distillation (HD) of 300 g and different solvent extraction of 1 g CGT (n = 3).** Hexane (Hex), methanol (MeOH), ethanol (EtOH), dichloromethane (DCM), ethyl acetate (EtOAc) and diethyl ether (DE). Error bars represent standard deviation of terpenoids concentration in replicate samples. Different superscript letters indicate significant differences ( $P < 0.05$ ).

(TIF)

**S1 Table. Recovery of CGT oil and volatile terpenoids present in CGT samples from preliminary hydro-distillation.**

(PDF)

**S2 Table. Percentage abundance of volatiles in hydro-distilled CGT extracts.**

(PDF)

**S3 Table. Mean percentage (n = 3) composition of terpenoids extracted from one gram of CGT samples using different organic solvents.**

(PDF)

## Author Contributions

**Funding acquisition:** Shane McIntosh, Tony Vancov, Lei Liu.

**Investigation:** Mary A. Egbuta.

**Methodology:** Mary A. Egbuta.

**Project administration:** Mary A. Egbuta, Lei Liu.

**Supervision:** Shane McIntosh, Daniel L. E. Waters, Tony Vancov, Lei Liu.

**Writing – original draft:** Mary A. Egbuta.

**Writing – review & editing:** Mary A. Egbuta, Shane McIntosh, Daniel L. E. Waters, Tony Vancov, Lei Liu.

## References

1. Egbuta MA, McIntosh S, Waters DL, Vancov T, Liu L. Biological importance of cotton by-products relative to chemical constituents of the cotton plant, *Molecules* 2017; 22(1): 93; <https://doi.org/10.3390/molecules22010093> PMID: 28067842
2. Chaudhary MR. Harvesting and ginning of cotton in the world [Internet]. 2011. [http://www.icac.org/cotton\\_info/speeches/Chaudhry/BW97.pdf](http://www.icac.org/cotton_info/speeches/Chaudhry/BW97.pdf)
3. Knox O, Rochester I, Vadakattu G, Lawrence L. Composting in Australian cotton production. The Australian Cotton Grower. Australia: Australian Cotton Research Institute; 2006: 46–48. [http://www.greenmountpress.com.au/cottongrower/Backissues/274ascot06/46\\_Composting.pdf](http://www.greenmountpress.com.au/cottongrower/Backissues/274ascot06/46_Composting.pdf)
4. Rogers GM, Poore MH, Paschal JC. Feeding cotton products to cattle. *Verterinary Clin North Am Food Anim Pract.* 2002; 18: 267–294.
5. Haleem N, Arshad M, Shahid M, Tahir MA. Synthesis of carboxymethyl cellulose from waste of cotton ginning industry. *Carbohydr Polym.* 2014; 113: 249–255. <http://dx.doi.org/10.1016/j.carbpol.2014.07.023> PMID: 25256482
6. Agblevor FA, Batz S, Trumbo J. Composition and ethanol production potential of cotton gin residues. *Appl Biochem Biotechnol.* 2003; 105: 219–230. Available: <http://www.ncbi.nlm.nih.gov/pubmed/12721487> PMID: 12721487
7. Jeoh T, Agblevor FA. Characterization and fermentation of steam exploded cotton gin waste. *Biomass and Bioenergy.* 2001; 21: 109–120. [http://dx.doi.org/10.1016/S0961-9534\(01\)00028-9](http://dx.doi.org/10.1016/S0961-9534(01)00028-9)
8. McIntosh S, Vancov T, Palmer J, Morris S. Ethanol production from cotton gin trash using optimised dilute acid pretreatment and whole slurry fermentation processes. *Bioresour Technol.* 2014; 173: 42–51. <https://doi.org/10.1016/j.biortech.2014.09.063> PMID: 25280112
9. Shen J, Agblevor FA. Ethanol production of semi-simultaneous saccharification and fermentation from mixture of cotton gin waste and recycled paper sludge. *Bioprocess Biosyst Eng.* 2011; 34: 33–43. <https://doi.org/10.1007/s00449-010-0444-4> PMID: 20559849
10. Bennett RN, Wallsgrave RM. Secondary metabolites in plant defence mechanisms. *New Phytol.* Blackwell Publishing Ltd; 1994; 127: 617–633. <https://doi.org/10.1111/j.1469-8137.1994.tb02968.x>
11. Degenhardt J, Köllner TG, Gershenzon J. Monoterpene and sesquiterpene synthases and the origin of terpene skeletal diversity in plants. *Phytochemistry.* 2009; 70: 1621–1637. <http://dx.doi.org/10.1016/j.phytochem.2009.07.030> PMID: 19793600
12. Pare PW, Tumlinson JH. De Novo Biosynthesis of Volatiles Induced by Insect Herbivory in Cotton Plants. *Plant Physiol.* 1997; 114: 1161–1167. <https://doi.org/10.1104/pp.114.4.1161> PMID: 12223763
13. Rose USR, Tumlinson JH. Systemic induction of volatile release in cotton: How specific is the signal to herbivory? *Planta.* 2005; 222: 327–335. Available: [http://download-v2.springer.com/static/pdf/598/art%253A10.1007%252Fs00425-005-1528-2.pdf?token2=exp=1432870421~acl=%2Fstatic%2Fpdf%2F598%2Fart%25253A10.1007%25252Fs00425-005-1528-2.pdf\\*~hmac=7d42c9599e2a03ce0bb278f81d3b738438720cc8469c4c0d21fcb1e040bc29ba](http://download-v2.springer.com/static/pdf/598/art%253A10.1007%252Fs00425-005-1528-2.pdf?token2=exp=1432870421~acl=%2Fstatic%2Fpdf%2F598%2Fart%25253A10.1007%25252Fs00425-005-1528-2.pdf*~hmac=7d42c9599e2a03ce0bb278f81d3b738438720cc8469c4c0d21fcb1e040bc29ba) <https://doi.org/10.1007/s00425-005-1528-2> PMID: 15856281
14. Hedin PA, Thompson AC, Gueldner RC. Constituents of cotton bud essential oil. *Phytochemistry.* 1975; 14: 2087–2088. [http://dx.doi.org/10.1016/0031-9422\(75\)83137-2](http://dx.doi.org/10.1016/0031-9422(75)83137-2)
15. Hedin PA, Thompson AC, Gueldner RC, Rizk AM, Salama HS. Egyptian cotton leaf essential oil. *Phytochemistry.* 1972; 11: 2356–2357. [http://dx.doi.org/10.1016/S0031-9422\(00\)88415-0](http://dx.doi.org/10.1016/S0031-9422(00)88415-0)
16. Thompson AC, Baker DN, Gueldner RC, Hedin PA. Identification and Quantitative Analysis of the Volatile Substances Emitted by Maturing Cotton in the Field. *Plant Physiol.* 1971; 48: 50–52. Available: <http://www.ncbi.nlm.nih.gov/pmc/articles/PMC396798/> <https://doi.org/10.1104/pp.48.1.50> PMID: 16657733
17. Elzen GW, Williams HJ, Bell AA, Stipanovic RD, Vinson SB. Quantification of volatile terpenes of glanded and glandless *Gossypium hirsutum* L. cultivars and lines by gas chromatography. *J Agric Food Chem.* American Chemical Society; 1985; 33: 1079–1082. <https://doi.org/10.1021/jf00066a015>
18. Huang X, Xiao Y, Köllner TG, Zhang W, Wu J, Wu J, et al. Identification and characterization of (E)- $\beta$ -caryophyllene synthase and  $\alpha/\beta$ -pinene synthase potentially involved in constitutive and herbivore-induced terpene formation in cotton. *Plant Physiol Biochem.* 2013; 73: 302–308. <http://dx.doi.org/10.1016/j.plaphy.2013.10.017> PMID: 24184450



19. Opitz S, Kunert G, Gershenzon J. Increased terpenoid accumulation in cotton (*Gossypium hirsutum*) foliage is a general wound response. *J Chem Ecol*. New York: Springer-Verlag; 2008; 34: 508–522. <https://doi.org/10.1007/s10886-008-9453-z> PMID: 18386096
20. Perveen SS, Qaisrani TM, Siddiqui F, Perveen R, Naqvi SHM. Cotton plant volatiles and insect's behavior. *Pakistan J Biol Sci*. 2001; 4: 554–558.
21. Chen QF, Liu ZP, Wang FP. Natural sesquiterpenoids as cytotoxic anticancer agents. *Mini-Reviews Med Chem*. 2011; 11: 1153–1164.
22. Nerio LS, Olivero-Verbel J, Stashenko E. Repellent activity of essential oils: A review. *Bioresour Technol*. 2010; 101: 372–378. <http://dx.doi.org/10.1016/j.biortech.2009.07.048> PMID: 19729299
23. Voon HC, Bhat R, Rusul G. Flower Extracts and Their Essential Oils as Potential Antimicrobial Agents for Food Uses and Pharmaceutical Applications. *Compr Rev Food Sci Food Saf*. Blackwell Publishing Inc; 2012; 11: 34–55. <https://doi.org/10.1111/j.1541-4337.2011.00169.x>
24. Azmir J, Zaidul ISM, Rahman MM, Sharif KM, Mohamed A, Sahena F, et al. Techniques for extraction of bioactive compounds from plant materials: A review. *J Food Eng*. 2013; 117: 426–436. <http://dx.doi.org/10.1016/j.jfoodeng.2013.01.014>
25. Hernández Y, Lobo MG, González M. Factors affecting sample extraction in the liquid chromatographic determination of organic acids in papaya and pineapple. *Food Chem*. 2009; 114: 734–741. <http://dx.doi.org/10.1016/j.foodchem.2008.10.021>
26. Berka-Zougali B, Ferhat M-A, Hassani A, Chemat F, Allaf KS. Comparative Study of Essential Oils Extracted from Algerian *Myrtus communis* L. Leaves Using Microwaves and Hydrodistillation. *Int J Mol Sci. Molecular Diversity Preservation International (MDPI)*; 2012; 13: 4673–4695. <https://doi.org/10.3390/ijms13044673> PMID: 22606003
27. Joana Gil-Chávez G, Villa JA, Fernando Ayala-Zavala J, Basilio Heredia J, Sepulveda D, Yahia EM, et al. Technologies for Extraction and Production of Bioactive Compounds to be Used as Nutraceuticals and Food Ingredients: An Overview. *Compr Rev Food Sci Food Saf*. 2013; 12: 5–23. <https://doi.org/10.1111/1541-4337.12005>
28. Okoh OO, Sadimenko AP, Afolayan AJ. Comparative evaluation of the antibacterial activities of the essential oils of *Rosmarinus officinalis* L. obtained by hydrodistillation and solvent free microwave extraction methods. *Food Chem*. 2010; 120: 308–312. <http://dx.doi.org/10.1016/j.foodchem.2009.09.084>
29. Omar J, Olivares M, Alonso I, Vallejo A, Aizpurua-Olaizola O, Etxebarria N. Quantitative Analysis of Bioactive Compounds from Aromatic Plants by Means of Dynamic Headspace Extraction and Multiple Headspace Extraction-Gas Chromatography-Mass Spectrometry. *J Food Sci*. 2016; 81: C867–C873. <https://doi.org/10.1111/1750-3841.13257> PMID: 26925555
30. Azwanida NN. A Review on the Extraction Methods Use in Medicinal Plants, Principle, Strength and Limitation. *Med Aromat Plants*. 2015; 4: 1–6. <https://doi.org/10.4172/2167-0412.1000196>
31. Zhang X, Gao H, Zhang L, Liu D, Ye X. Extraction of essential oil from discarded tobacco leaves by solvent extraction and steam distillation, and identification of its chemical composition. *Ind Crops Prod*. 2012; 39: 162–169. <https://doi.org/10.1016/j.indcrop.2012.02.029>
32. Mu'azu K, Okonkwo EM, Abdullahi M. Economic Analysis of Production of Essential Oil using Steam Distillation Technology. *Niger J Basic Appl Sci*. 2009; 17: 218–222.
33. Rassem HHA, Nour AH, Yunus RM. Techniques For Extraction of Essential Oils From Plants: A Review. *Aust J Basic Appl Sci*. 2016; 10: 117–127.
34. Siddique AB, Mizanur Rahman SM, Hossain MA. Chemical composition of essential oil by different extraction methods and fatty acid analysis of the leaves of *Stevia Rebaudiana* Bertoni. *Arab J Chem*. 2016; 9: S1185–S1189. <https://doi.org/10.1016/j.arabjc.2012.01.004>
35. Fitriady MA, Sulawatty A, Agustian E, Salahuddin, Aditama DPF. Steam distillation extraction of ginger essential oil: Study of the effect of steam flow rate and time process. *AIP Conf Proc*. 2017; 1803: 20032. <https://doi.org/10.1063/1.4973159>
36. Haypek E, Silva LHM, Batista E, Marques DS, Meireles MAA, Meireles AJA. Recovery of aroma compounds from orange essential oil. *Brazilian J Chem Eng*. 2000; 17: 705–712. Available: [http://www.scielo.br/scielo.php?script=sci\\_arttext&pid=S0104-6632200000400034&nrm=iso](http://www.scielo.br/scielo.php?script=sci_arttext&pid=S0104-6632200000400034&nrm=iso)
37. Loughrin JH, Manukian A, Heath RR, Turlings TC, Tumlinson JH. Diurnal cycle of emission of induced volatile terpenoids by herbivore-injured cotton plant. *Proc Natl Acad Sci*. 1994; 91: 11836–11840. Available: <http://www.pnas.org/content/91/25/11836.abstract> <https://doi.org/10.1073/pnas.91.25.11836> PMID: 11607499
38. Thompson AC, Hanny BW, Hedin PA, Gueldner RC. Phytochemical Studies in the Family Malvaceae. I. Comparison of Essential Oils of Six Species by Gas-liquid Chromatography. *Am J Bot. Botanical Society of America*; 1971; 58: 803–807. <https://doi.org/10.2307/2441557>

39. Yang C-Q, Wu X-M, Ruan J-X, Hu W-L, Mao Y-B, Chen X-Y, et al. Isolation and characterization of terpene synthases in cotton (*Gossypium hirsutum*). *Phytochemistry*. 2013; 96: 46–56. <http://dx.doi.org/10.1016/j.phytochem.2013.09.009> PMID: 24074555
40. Elizen GW, Williams HJ, Vinson SB. Isolation and identification of cotton synomones mediating searching behavior by parasitoid *Campoplex sonorensis*. *J Chem Ecol*. 1984; 10: 1251–1264. <https://doi.org/10.1007/BF00988552> PMID: 24318909
41. Huynh Q, Phan TD, Thieu VQQ, Tran ST, Do SH. Extraction and refining of essential oil from Australian tea tree, *Melaleuca alterfornia*, and the antimicrobial activity in cosmetic products. *J Phys Conf Ser*. 2012; 352: 12053. Available: <http://stacks.iop.org/1742-6596/352/i=1/a=012053>
42. Johns MR, Johns JE, Rudolph V. Steam distillation of tea tree (*Melaleuca alternifolia*) oil. *J Sci Food Agric*. 1992; 58: 49–53. <https://doi.org/10.1002/jsfa.2740580109>
43. Bell AA. Physiology of secondary products. In: Mauney JR, Stewart JM, editors. *Cotton physiology*. Memphis, TN: The Cotton Foundation; 1986. pp. 597–621.
44. Bourland FM, Gbur EE. Relationships of plant trichomes to yield and fiber quality parameters in upland cotton. *J Cotton Sci*. 2017; 21: 296–305.
45. Boykin JC, Bourland F, Dobbs DM. Relationship of leaf and bract trichomes to trash content of ginned lint. Beltwide Cotton Production Research Conference. San Antonio, TX: National Cotton Council Am., Memphis, TN.; 2013. pp. 774–782.
46. Cai C, Zhang X, Niu E, Zhao L, Li N, Wang L, et al. GhPSY, a phytoene synthase gene, is related to the red plant phenotype in upland cotton (*Gossypium hirsutum* L.). *Mol Biol Rep*. 2014; 41: 4941–4952. <https://doi.org/10.1007/s11033-014-3360-x> PMID: 24718783
47. Ding M, Chen J, Jiang Y, Lin L, Cao Y, Wang M, et al. Genome-wide investigation and transcriptome analysis of the WRKY gene family in *Gossypium*. *Mol Genet Genomics*. Springer Berlin Heidelberg; 2015; 290: 151–171. <https://doi.org/10.1007/s00438-014-0904-7> PMID: 25190108
48. Kasperbauer MJ, Loughrin JH. Morphogenic Light Reflected to Developing Cotton Leaves Affects Insect-Attracting Terpene Concentrations. *Crop Sci*. Madison, WI: Crop Science Society of America; 2004; 44: 198–203. <https://doi.org/10.2135/cropsci2004.1980>
49. Fahn A. Functions and location of secretory tissues in plants and their possible evolutionary trends. *Isr J Plant Sci*. Taylor & Francis Ltd; 2002; 50: s59–S64. Available: <http://ezproxy.scu.edu.au/login?url=http://search.ebscohost.com/login.aspx?direct=true&db=aph&AN=14592168&site=ehost-live>
50. Huchelmann A, Boutry M, Hachez C. Plant Glandular Trichomes: Natural Cell Factories of High Biotechnological Interest. *Plant Physiol*. American Society of Plant Biologists; 2017; 175: 6–22. <https://doi.org/10.1104/pp.17.00727> PMID: 28724619
51. King DJ, Gleadow RM, Woodrow IE. Regulation of oil accumulation in single glands of *Eucalyptus polybractea*. *New Phytol*. 2006; 172: 440–451. <https://doi.org/10.1111/j.1469-8137.2006.01842.x> PMID: 17083675
52. Wang G, Tian L, Aziz N, Broun P, Dai X, He J, et al. Terpene Biosynthesis in Glandular Trichomes of Hop. *Plant Physiol*. American Society of Plant Biologists; 2008; 148: 1254–1266. <https://doi.org/10.1104/pp.108.125187> PMID: 18775972
53. Chen Y, Wen Y, Chen Y, Cothren JT, Zhang X, Wang Y, et al. Effects of Extreme Air Temperature and Humidity on the Insecticidal Expression Level of Bt Cotton. *J Integr Agric*. 2012; 11: 1836–1844. [http://dx.doi.org/10.1016/S2095-3119\(12\)60188-9](http://dx.doi.org/10.1016/S2095-3119(12)60188-9)
54. Chen Y, Wu Y-G, Xu Y, Zhang J-F, Song X-Q, Zhu G-P, et al. Dynamic accumulation of sesquiterpenes in essential oil of *Pogostemon cablin*. *Rev Bras Farmacogn*. 2014; 24: 626–634. <https://doi.org/10.1016/j.bjp.2014.11.001>
55. Fisheries QD of A and. Insect pest management in cotton [Internet]. 2010. <https://www.daf.qld.gov.au/business-priorities/plants/field-crops-and-pastures/broadacre-field-crops/integrated-pest-management/ipm-information-by-crop/cotton>
56. Eisenring M, Meissle M, Hagenbucher S, Naranjo SE, Wettstein F, Romeis J. Cotton Defense Induction Patterns Under Spatially, Temporally and Quantitatively Varying Herbivory Levels. *Front Plant Sci*. 2017; 8. <https://doi.org/10.3389/fpls.2017.00234> PMID: 28270830
57. Hajaji S, Sifaoui I, López-Arencibia A, Reyes-Battle M, Valladares B, Pinero José E, et al. Amoebicidal activity of  $\alpha$ -bisabolol, the main sesquiterpene in chamomile (*Matricaria recutita* L.) essential oil against the trophozoite stage of *Acanthamoeba castellanii* Neff [Internet]. *Acta Parasitologica*. 2017. p. 290. <https://doi.org/10.1515/ap-2017-0036> PMID: 28426414
58. Srivastava JK, Shankar E, Gupta S. Chamomile: A herbal medicine of the past with bright future. *Mol Med Rep*. 2010; 3: 895–901. <https://doi.org/10.3892/mmr.2010.377> PMID: 21132119
59. Lima FWJ, Dantas-Barros AM, Soares BM, de Santos DA, de Resende MA, de Carvalho MAR, et al. The composition and anti-microbial activity of the essential oil from *Eremanthus erythropappus* (DC)

- Macleish (Candeia). *Int J Med Aromat Plants*. New Delhi: Open Access Science Research Publisher; 2013; 3: 1–10.
60. Minyard JP, Thompson AC, Hedin PA. Constituents of the cotton bud. VIII. .beta.-Bisabolol, a new sesquiterpene alcohol. *J Org Chem*. American Chemical Society; 1968; 33: 909–911. <https://doi.org/10.1021/jo01266a116>
  61. Braun NA, Meier M, Pickenhagen W. Isolation and Chiral GC Analysis of  $\beta$ -Bisabolols—Trace Constituents from the Essential Oil of *Santalum album* L. (Santalaceae). *J Essent Oil Res*. Taylor & Francis; 2003; 15: 63–65. <https://doi.org/10.1080/10412905.2003.9712064>
  62. Weyerstahl P, Marschall-Weyerstahl H, Christiansen C. Constituents of ayou essential oil (*Ayudendron barbeyana* Mez). *Flavour Fragr J*. 1989; 4: 93–98. <https://doi.org/10.1002/ffj.2730040302>
  63. Cavaliere E, Mariotto S, Fabrizi C, de Prati AC, Gottardo R, Leone S, et al.  $\alpha$ -Bisabolol, a nontoxic natural compound, strongly induces apoptosis in glioma cells. *Biochem Biophys Res Commun*. 2004; 315: 589–594. <https://doi.org/10.1016/j.bbrc.2004.01.088> PMID: 14975741
  64. Chen W, Hou J, Yin Y, Jang J, Zheng Z, Fan H, et al.  $\alpha$ -Bisabolol induces dose- and time-dependent apoptosis in HepG2 cells via a Fas- and mitochondrial-related pathway, involves p53 and NF $\kappa$ B. *Biochem Pharmacol*. 2010; 80: 247–254. <https://doi.org/10.1016/j.bcp.2010.03.021> PMID: 20346922
  65. De Lucca AJ, Pauli A, Schilcher H, Sien T, Bhatnagar D, Walsh TJ. Fungicidal and Bactericidal Properties of Bisabolol and Dragosantol. *J Essent Oil Res*. Taylor & Francis; 2011; 23: 47–54. <https://doi.org/10.1080/10412905.2011.9700457>
  66. Kamatou GPP, Viljoen AM. A Review of the Application and Pharmacological Properties of  $\alpha$ -Bisabolol and  $\alpha$ -Bisabolol-Rich Oils. *J Am Oil Chem Soc*. Springer Science & Business Media B.V.; 2010; 87: 1–7. <https://doi.org/10.1007/s11746-009-1483-3>
