# Supplementary material for: Chemical volatiles present in cotton gin trash: A by-product of cotton processing
Source: PLOS journal article supplement (doi:10.1371/journal.pone.0222146), 2019-09-18
Supplement: S4 (10.1371/journal.pone.0222146.s004) [file journal.pone.0222146.s004]

**S1 Table. Recovery of CGT oil and volatile terpenoids present in CGT samples from preliminary hydro-distillation**

| Mass of oil extracted<br>(Percentage ) |                   | 6 h               | 12 h            | 18 h              |
|----------------------------------------|-------------------|-------------------|-----------------|-------------------|
|                                        |                   | 260 mg<br>(91.2%) | 20 mg<br>(7.0%) | > 10 mg<br>(1.8%) |
| Terpenoids identified                  | Match quality (%) | % recovery        |                 |                   |
|                                        |                   |                   |                 |                   |
| <b>Monoterpenoids</b>                  |                   |                   |                 |                   |
| $\alpha$ -pinene                       | 96                | 100.0             | 0.0             | 0.0               |
| myrcene                                | 96                | 100.0             | 0.0             | 0.0               |
| <b>Sesquiterpenoids</b>                |                   |                   |                 |                   |
| $\alpha$ -copaene                      | 99                | 95.1              | 4.9             | 0.0               |
| $\alpha$ -santalene                    | 98                | 96.6              | 3.4             | 0.0               |
| $\beta$ -caryophyllene                 | 99                | 96.4              | 3.1             | 0.5               |
| $\beta$ -santalene                     | 96                | 79.7              | 17.3            | 3.0               |
| $\alpha$ -humulene                     | 98                | 97.1              | 2.4             | 0.4               |
| $\beta$ -farnesene                     | 98                | 95.4              | 3.8             | 0.8               |
| $\beta$ -bisabolene                    | 65                | 96.2              | 3.8             | 0.0               |
| $\gamma$ -bisabolene                   | 65                | 94.7              | 4.6             | 0.7               |
| caryophyllene oxide                    | 96                | 97.6              | 2.0             | 0.4               |
| humulene epoxide II                    | 75                | 95.9              | 3.6             | 0.5               |
| gossonorol                             | 65                | 89.7              | 9.1             | 1.2               |
| $\beta$ -bisabolol                     | 98                | 89.2              | 9.2             | 1.7               |

\*This is a pilot experiment to estimate the hydro-distillation time required for extracting majority of volatile compounds from CGT. No replications have been carried out.
