# Supplementary material for: Chemical volatiles present in cotton gin trash: A by-product of cotton processing
Source: PLOS journal article supplement (doi:10.1371/journal.pone.0222146), 2019-09-18
Supplement: S6 (10.1371/journal.pone.0222146.s006) [file journal.pone.0222146.s006]

**S3 Table. Mean percentage (n=3) composition of terpenoids extracted from one gram of CGT samples using different organic solvents**

|              | $\alpha$ -pinene            | $\beta$ -caryophyllene       | $\alpha$ -humulene         | caryophyllene oxide          | $\beta$ -bisabolol          |
|--------------|-----------------------------|------------------------------|----------------------------|------------------------------|-----------------------------|
| <b>Hex</b>   | 5.5 $\pm$ 0.3 <sup>ab</sup> | 19.6 $\pm$ 0.7 <sup>ab</sup> | 7.3 $\pm$ 0.8 <sup>a</sup> | 22.1 $\pm$ 0.5 <sup>a</sup>  | 45.6 $\pm$ 2.3 <sup>c</sup> |
| <b>MeOH</b>  | 4.9 $\pm$ 0.2 <sup>a</sup>  | 17.7 $\pm$ 0.1 <sup>a</sup>  | 6.3 $\pm$ 0.2 <sup>a</sup> | 27.2 $\pm$ 0.3 <sup>cd</sup> | 43.8 $\pm$ 0.1 <sup>c</sup> |
| <b>EtOH</b>  | 5.5 $\pm$ 0.4 <sup>ab</sup> | 18.9 $\pm$ 0.3 <sup>ab</sup> | 6.7 $\pm$ 0.2 <sup>a</sup> | 26.5 $\pm$ 1.2 <sup>c</sup>  | 42.5 $\pm$ 0.3 <sup>c</sup> |
| <b>DCM</b>   | 9.1 $\pm$ 1.0 <sup>c</sup>  | 24.3 $\pm$ 1.5 <sup>c</sup>  | 9.0 $\pm$ 0.1 <sup>b</sup> | 32.3 $\pm$ 0.1 <sup>e</sup>  | 25.3 $\pm$ 2.2 <sup>a</sup> |
| <b>EtOAc</b> | 6.4 $\pm$ 0.4 <sup>b</sup>  | 20.5 $\pm$ 0.4 <sup>b</sup>  | 7.1 $\pm$ 0.8 <sup>a</sup> | 28.2 $\pm$ 0.3 <sup>d</sup>  | 37.9 $\pm$ 1.1 <sup>b</sup> |
| <b>DE</b>    | 5.4 $\pm$ 0.1 <sup>ab</sup> | 18.7 $\pm$ 0.2 <sup>ab</sup> | 6.8 $\pm$ 0.1 <sup>a</sup> | 25.1 $\pm$ 0.5 <sup>b</sup>  | 44.0 $\pm$ 0.7 <sup>c</sup> |
| <b>P</b>     | 0.003                       | 0.003                        | 0.010                      | <0.001                       | <0.001                      |
| <b>HD</b>    |                             | 2.4 $\pm$ 0.2 <sup>1</sup>   | 1.3 $\pm$ 0.1 <sup>1</sup> | 24.5 $\pm$ 0.5 <sup>2</sup>  | 69.8 $\pm$ 0.5 <sup>3</sup> |

Values are mean percentage composition  $\pm$  standard deviation of terpenoids quantified. Different superscript letters indicate significant differences ( $P < 0.05$ ) between solvents for the same terpenoid, whereas, different superscript numbers indicate significant difference between terpenoids extracted by hydro-distillation. Percentage composition calculated based on total concentration ( $\mu\text{g/g}$ ) of major terpenoids identified and quantified in the different organic solvent extracts of CGT.
